# Supplementary material for: Air-gap embedded triboelectric nanogenerator via surface modification of non-contact layer using sandpapers
Source: Royal Society of Chemistry journal article supplement (doi:10.1039/d1nr01517f), 2021-01-01
Supplement: d1nr01517f1.pdf [file d1nr01517f1.pdf]

## Supporting Information

# Air-gap embedded triboelectric nanogenerator via surface modification of non-contact layer using sandpapers

*Inkyum Kim, Hyeonhee Roh, Wontae Choi, Daewon Kim \**

Department of Electronic Engineering, Institute for Wearable Convergence Electronics,  
Kyung Hee University, 1732 Deogyong-daero, Giheung-gu, Yongin 17104, Republic of  
Korea

\* Corresponding authors

Email address: daewon@khu.ac.kr (D. Kim)

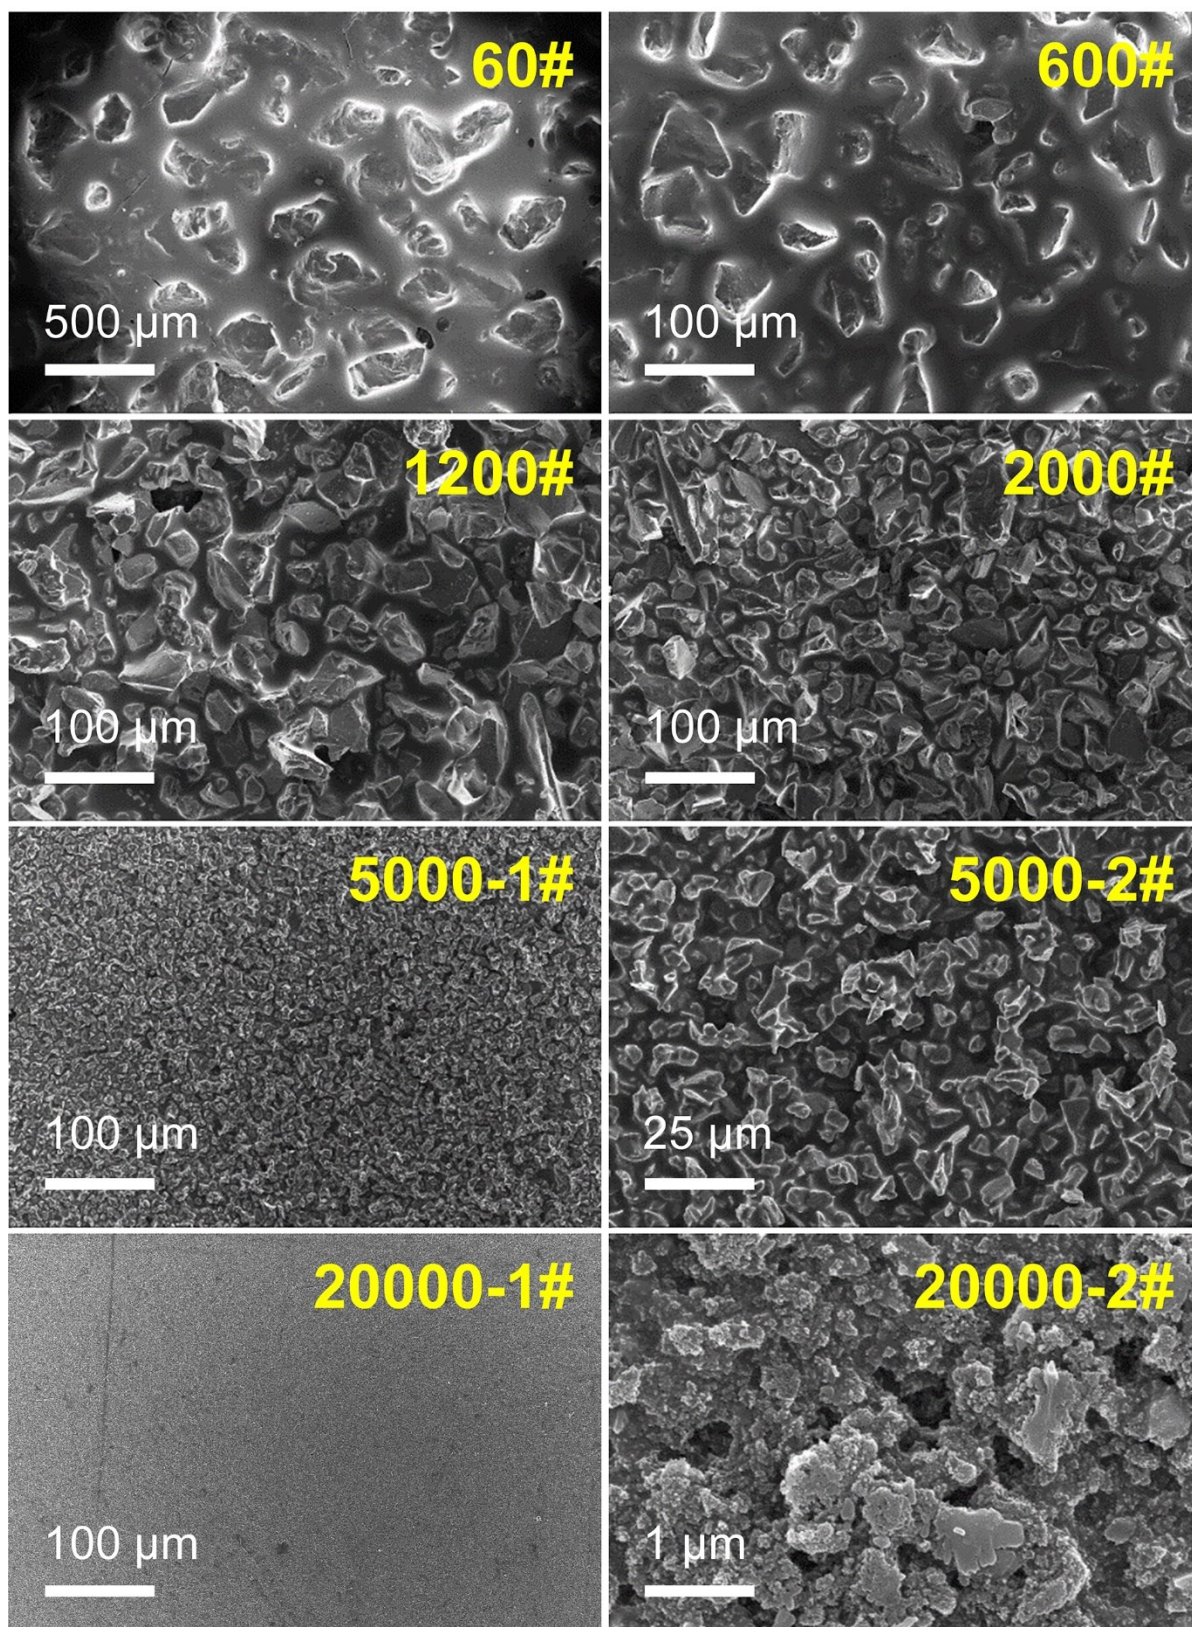

**Fig. S1** Images of the surface of bare sandpapers with different grit numbers.

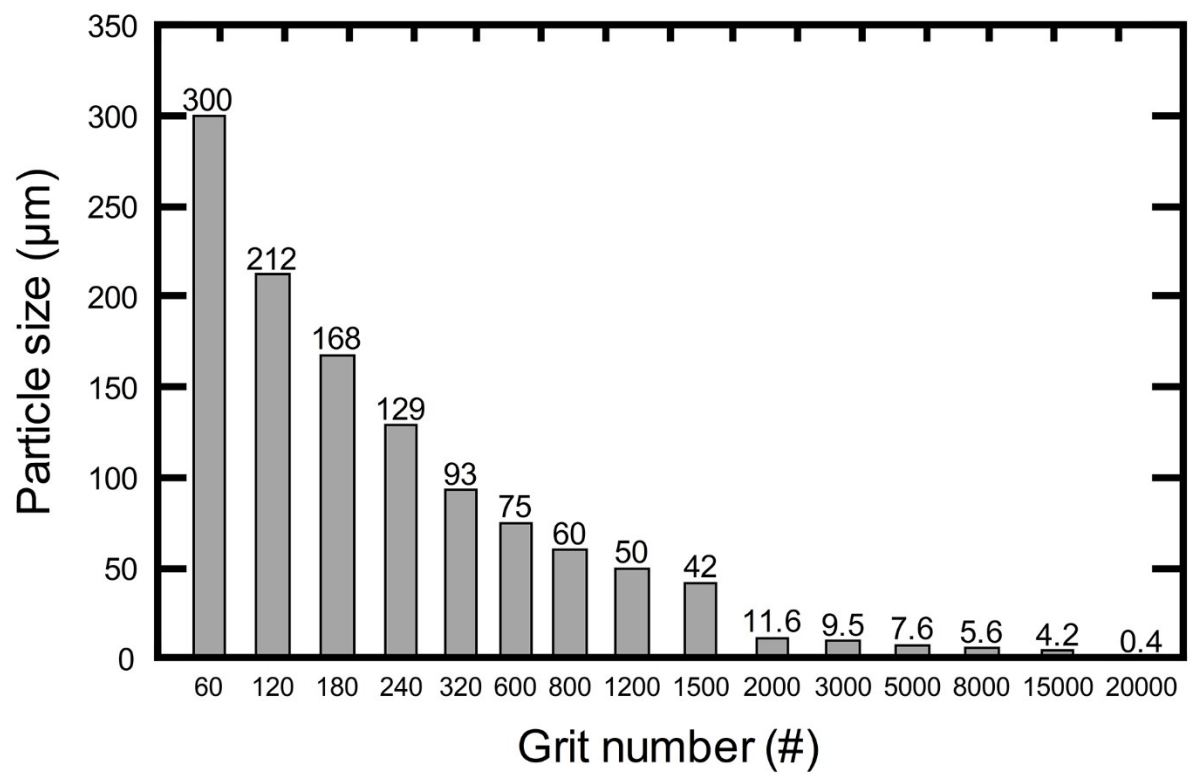

**Fig. S2** The particle size of sandpapers with different grit numbers.

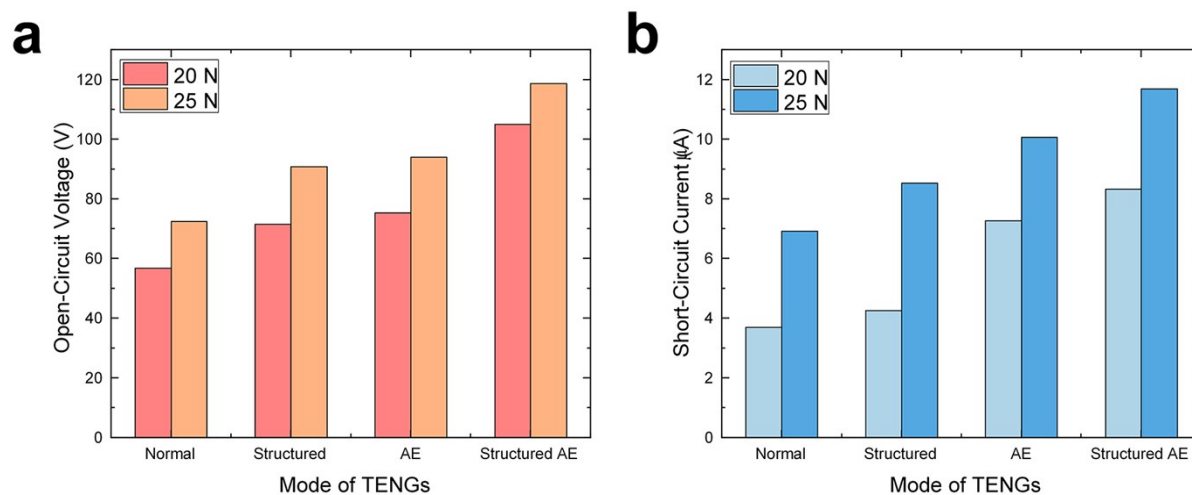

**Fig. S3** (a)  $V_{OC}$  and (b)  $I_{SC}$  by using the contact-separation TENG device with PTFE substrates, Al electrodes, and PDMS contact layer with 20 N and 25 N of the input force.

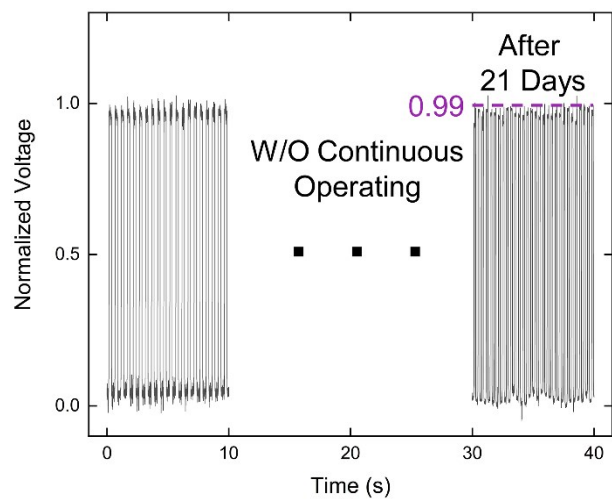

**Fig. S4** Intermittent durability test of the structure AE-TENG for 21 days.

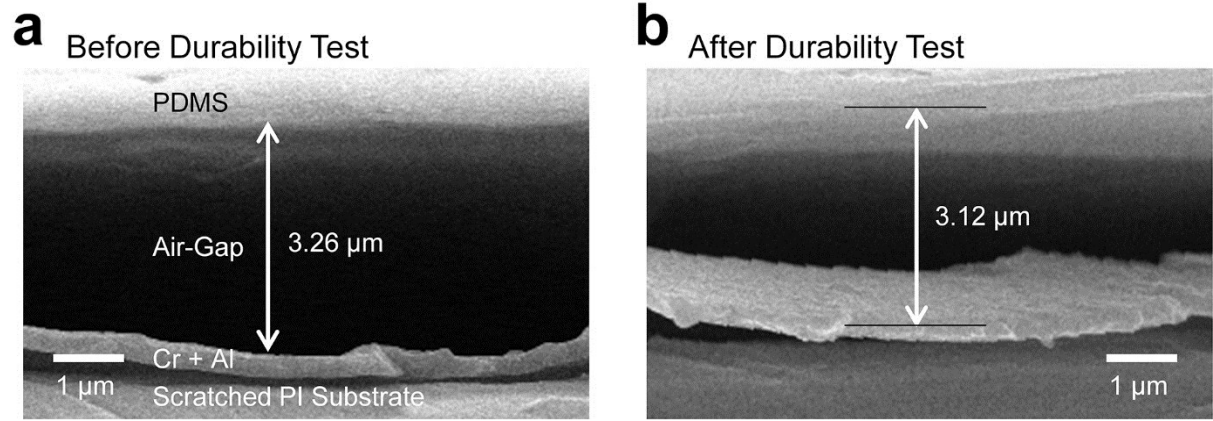

**Fig. S5** SEM image for showing the air-gap (a) before durability test and (b) after durability test.
